# Supplementary material for: Migratory Birds Monitoring of India’s Largest Shallow Saline Ramsar Site with Big Geospatial Data Using Google Earth Engine for Restoration
Source: Preprints.org preprint supplement (doi:10.20944/preprints202110.0202.v1), 2021-10-13
Supplement: Supplementary file 1 [file supplementary]

## Sheet: Sheet1
	Literature data			Own bird census data
family	1994-97	2003	2013	2019	2020	2021
Anhingidae	Darter	Darter
Accipitridae	Egyptian vulture				Western Marsh-Harrier
Alaudidae					Crested Lark
Anatidae	Greylag goose	Bar-headed goose	Greylag goose	Greylag Goose	Common Pochard	Lesser whistling duck
	Bar-headed goose	Greylag goose	Red-crested pochard	Barheaded Goose	Northern Shoveler	Greylag goose
	Ruddy shelduck	Indian spot-billed duck	Western Gadwall	Gadwall		Indian spot-billed duck
	Cotton pygmy goose	Northern shoveler	Indian spot-billed duck	Common Teal		Tufted duck
	Gadwall	Northern pintail	Ruddy shelduck	Northern Shoveler		Garganey
	Eurasian wigeon	Common Teal	Northern pintail			Knob-billed duck
	Mallard		Northern shoveler			Gadwall
	Indian spot-billed duck		Common Teal			Common Teal
	Northern shoveler					Northern shoveler
	Northern pintail
	Garganey
	Common Teal
	Red-crested pochard
	Common pochard
	Tufted duck
Ardeidae	Little egret	Little egret	Cattle egret	Black-crowned Night Heron	Indian Pond Heron	Indian pond heron
	Grey heron	Great egret	Median Egret		Cattle Egret	Purple heron
	Purple heron	Cattle egret	Little egret			Grey heron
	Great egret	Indian pond heron	Indian pond heron			Cattle egret
	Median Egret	Black-crowned night heron				Little egret
	Cattle egret	Grey heron				Great egret
	Indian pond heron	Purple heron
	Black-crowned night heron
Burhinidae			Indian stone-curlew	Great stone curlew
Charadriidae	European golden plover	Little ringed plover	Little ringed plover	Little-ringed plover	Little-ringed plover	Little ringed plover
	Little ringed plover	Kentish plover	Kentish plover	Kentish Plover	Pacific Golden Plover	Kentish plover
	Kentish plover	Red-wattled lapwing	Lesser sand plover	Red-wattled Lapwing	Kentish Plover	Red-wattled lapwing
	Greater sand plover	Yellow-wattled lapwing	Red-wattled lapwing	White-tailed Lapwing	Red-wattled Lapwing
	Yellow-wattled lapwing			Yellow-wattled lapwing	White-tailed Lapwing
	River lapwing
	Red-wattled lapwing
Ciconiidae	Painted stork	Painted stork				Painted stork
	Black stork	Black stork
Cuculidae					Greater Coucal
Glareolidae	Collared pratincole	Collared pratincole
Gruidae	Sarus crane	Common crane	Demoiselle crane
	Demoiselle crane	Sarus crane	Common crane
	Common crane	Demoiselle crane
Laridae	Yellow-legged gull	Brown-headed Gull	Brown-headed gull		Brown-headed Gull	Pallas's gull
	Brown-headed Gull	Black-headed gull	Black-headed gull			Gull-billed tern
	Black-headed gull	River tern	Whiskered tern			River tern
	River tern	Black-bellied tern	Gull-billed tern
	Whiskered tern	Whiskered tern
Motacillidae				White Wagtail	White Wagtail
				Grey Wagtail	White-browed Wagtail
Pelecanidae	Great white pelican	Great white pelican
Phalacrocoracidae	Little Cormorant	Little Cormorant				Great cormorant
	Great cormorant	Great cormorant				Little Cormorant
Phoenicopteridae	Greater flamingo	Greater flamingo	Greater flamingo	Greater Flamingo	Greater Flamingo	Greater flamingo
	Lesser flamingo	Lesser flamingo	Lesser flamingo	Lesser Flamingo	Lesser Flamingo
Podicipedidae	Little grebe	Little grebe	Little grebe	Little grebe		Little grebe
	Great crested grebe
Rallidae	Purple moorhen	Common moorhen				White-breasted waterhen
	Eurasian coot	Purple Moorhen				Common moorhen
		Eurasian coot				Eurasian coot
Recurvirostridae	Black-winged stilt	Black-winged stilt	Black-winged Stilt	Black-winged Stilt	Black-winged Stilt	Black-winged stilt
	Pied Avocet	Pied avocet	Pied Avocet	Pied Avocet	Pied Avocet	Pied avocet
Scolopacidae	Pin-tailed snipe	Common sandpiper	Eurasian curlew	Common Redshank	Black-tailed Godwit	Black-tailed godwit
	Common snipe	Marsh sandpiper	Black-tailed godwit		Eurasian Curlew	Common redshank
	Black-tailed godwit	Little stint	Little stint	Black-tailed Godwit	Common Redshank	Marsh sandpiper
	Eurasian whimbrel	Temminck's stint	Temminck's stint	Curlew Sandpiper	Common Greenshank	Wood sandpiper
	Eurasian curlew	Common snipe	Marsh sandpiper	Marsh Sandpiper	Marsh Sandpiper	Little stint
	Common redshank	Black-tailed godwit	Broad-billed sandpiper	Wood Sandpiper	Green Sandpiper	Ruff
	Marsh sandpiper	Eurasian curlew	Common sandpiper	Common Sandpiper	Wood Sandpiper
	Common greenshank		Curlew sandpiper	Little stint	Common Sandpiper
	Common sandpiper		Green sandpiper	Temminck’s Stint	Little stint
	Sanderling		Wood sandpiper	Ruff	Temminck’s Stint
	Little stint		Common redshank		Ruff
	Temminck's stint		Common greenshank		Pin-tailed snipe
	Curlew sandpiper		Ruff
	Ruff		Red phalarope
			Ruddy turnstone
Threskiornithidae	Glossy ibis	Glossy ibis				Red-naped ibis
	Eurasian spoonbill	Oriental white ibis				Glossy ibis
		Red-naped ibis				Eurasian spoonbill
		Eurasian spoonbill
